# Supplementary material
Source: publisher figshare collection journal article supplement (https://plos.figshare.com/articles/dataset/_/9035468)
Supplement: Supplementary file [file 1]

**Supplement 1:** Alphabetical list of artifacts included in the present study with complete repository information.

\* Detailed context information can be found in [15, 19, 26-44].

| Museum nb.    | Museum collection             | Object      | Location            | County        | Region/<br>Denmark | Context*         | Date    | artefact/<br>sample<br>accessible | Sample<br>number |
|---------------|-------------------------------|-------------|---------------------|---------------|--------------------|------------------|---------|-----------------------------------|------------------|
| B949          | Nationalmuseet København      | flanged axe | Aebelnaes           | Praestoe      | Zealand            | single find      | LN II   | yes                               | MA-171063        |
| B949 (1)      | Nationalmuseet København      | flanged axe | Aebelnaes           | Praestoe      | Zealand            | single find      | LN II   | yes                               | MA-171064        |
| FHM 6095      | Forhistorisk Museum Moesgaard | flanged axe | Albaek              | Randers       | Jutland            | single find      | LN II   | yes                               | MA-166611        |
| NM 1488       | Nationalmuseet København      | flanged axe | Als                 | Soenderborg   | Jutland            | single find      | NBA IA  | yes                               | MA-170433        |
| B3484         | Nationalmuseet København      | flanged axe | Alsoenderup         | Frederiksborg | Zealand            | single find      | LN II   | yes                               | MA-170378        |
| B8068         | Nationalmuseet København      | flanged axe | Amidgaard           | Randers       | Jutland            | single find      | LN II   | yes                               | MA-171074        |
| VMÅ139        | Vesthimmerlands Museum        | flanged axe | Dybvad Moelle (Ars) | Aalborg       | Jutland            | single find      | LN II   | yes                               | MA-171127        |
| B2956         | Nationalmuseet København      | flanged axe | Balslev             | Odense        | Fyn                | single find      | LN II   | yes                               | MA-170360        |
| NM 26061      | Nationalmuseet København      | flanged axe | Barritskov          | Vejle         | Jutland            | single find      | LN II   | yes                               | MA-170369        |
| FSM 4009      | Odense Bys Museer             | flanged axe | Bogense             | Odense        | Fyn                | single find      | LN II   | yes                               | MA-171106        |
| B15117        | Nationalmuseet København      | spearhead   | Bondesgaarde        | Horsens       | Jutland            | multi-type hoard | NBA IA  | yes                               | MA-180925        |
| B15110        | Nationalmuseet København      | spearhead   | Bondesgaarde        | Horsens       | Jutland            | multi-type hoard | NBA IA  | yes                               | MA-180926        |
| B15115        | Nationalmuseet København      | spearhead   | Bondesgaarde        | Horsens       | Jutland            | multi-type hoard | NBA IA  | yes                               | MA-180927        |
| B15101        | Nationalmuseet København      | spearhead   | Bondesgaarde        | Horsens       | Jutland            | multi-type hoard | NBA IA  | yes                               | MA-180928        |
| B15131        | Nationalmuseet København      | spearhead   | Bondesgaarde        | Horsens       | Jutland            | multi-type hoard | NBA IA  | yes                               | MA-180929        |
| B15135        | Nationalmuseet København      | spearhead   | Bondesgaarde        | Horsens       | Jutland            | multi-type hoard | NBA IA  | yes                               | MA-180930        |
| FSM B294      | Odense Bys Museer             | flanged axe | Brandslund          | Odense        | Fyn                | single find      | LN II   | yes                               | MA-171110        |
| ML6574        | Museum Lund                   | flanged axe | Breddinge           | Schonen       | Sweden             | single find      | LN II   | yes                               | MA-181036        |
| NM 26072      | Nationalmuseet København      | flanged axe | Brej1               | Skanderborg   | Jutland            | single find      | NBA IA  | yes                               | MA-166640        |
| NM 11073      | Nationalmuseet København      | flanged axe | Bygholm             | Vejle         | Jutland            | single find      | LN II   | yes                               | MA-170370        |
| FHM 3010      | Forhistorisk Museum Moesgaard | flanged axe | Ebeltoft (near)     | Randers       | Jutland            | single find      | LN II   | yes                               | MA-166616        |
| FHM 5788      | Forhistorisk Museum Moesgaard | flanged axe | Egtved              | Vejle         | Jutland            | single find      | LN II   | yes                               | MA-166617        |
| FHM 5554      | Forhistorisk Museum Moesgaard | flanged axe | Egaa                | Randers       | Jutland            | one-type hoard   | LN II   | yes                               | MA-166612        |
| FHM 5554      | Forhistorisk Museum Moesgaard | flanged axe | Egaa                | Randers       | Jutland            | one-type hoard   | LN II   | yes                               | MA-166613        |
| FHM 1179      | Forhistorisk Museum Moesgaard | flanged axe | Egaa                | Randers       | Jutland            | one-type hoard   | LN II   | yes                               | MA-166614        |
| FHM 1179      | Forhistorisk Museum Moesgaard | flanged axe | Egaa                | Randers       | Jutland            | one-type hoard   | LN II   | yes                               | MA-166615        |
| NM B6822      | Nationalmuseet København      | flanged axe | Ejstrup             | Skanderborg   | Jutland            | single find      | NBA IA  | yes                               | MA-166641        |
| B108          | Nationalmuseet København      | flanged axe | Ejstrup Holm        | Skanderborg   | Jutland            | single find      | NBA IA  | yes                               | MA-170435        |
| B8688         | Nationalmuseet København      | flanged axe | Bregnhoved          | Vejle         | Jutland            | single find      | LN II   | yes                               | MA-170349        |
| B13577        | Nationalmuseet København      | flanged axe | Ellesoe             | Odense        | Fyn                | single find      | LN II   | yes                               | MA-170359        |
| NM B3942      | Nationalmuseet København      | flanged axe | Emmerbølle          | Svendborg     | Fyn                | single find      | LN II   | yes/no                            | MA-166633        |
| FSM A395      | Odense Bys Museer             | flanged axe | Falsled             | Svendborg     | Fyn                | single find      | LN II   | yes                               | MA-171100        |
| NM 20828      | Nationalmuseet København      | flanged axe | Falster district    | Maribo        | Lolland            | single find      | LN II   | yes                               | MA-166623        |
| NM B13361     | Nationalmuseet København      | flanged axe | Fjellerup           | Randers       | Jutland            | single find      | NBA IA  | yes                               | MA-166639        |
| NM B13356     | Nationalmuseet København      | flanged axe | Flemloese           | Odense        | Fyn                | single find      | LN II   | yes                               | MA-166635        |
| FHM 26063     | Forhistorisk Museum Moesgaard | flanged axe | Flenstofte          | Odense        | Fyn                | single find      | LN II   | yes/no                            | MA-171084        |
| ML6573        | Museum Lund                   | flanged axe | Freddinge           | Schonen       | Sweden             | single find      | LN II   | yes                               | MA-181035        |
| NM 4415       | Nationalmuseet København      | flanged axe | Fyn                 | Fyn           | Fyn                | single find      | NBA IA  | yes                               | MA-166651        |
| NM 15102      | Nationalmuseet København      | flanged axe | Fyn                 | Fyn           | Fyn                | single find      | LN II   | yes                               | MA-170352        |
| FSM 27.6.1886 | Odense Bys Museer             | flanged axe | Faaborg             | Svendborg     | Fyn                | single find      | LN II   | yes                               | MA-171102        |
| B3887         | Nationalmuseet København      | flanged axe | Galleмосe           | Randers       | Jutland            | multi-type hoard | LN II   | yes                               | MA-170389        |
| B3888b        | Nationalmuseet København      | flanged axe | Galleмосe           | Randers       | Jutland            | multi-type hoard | LN II   | yes                               | MA-170390        |
| B3888c        | Nationalmuseet København      | flanged axe | Galleмосe           | Randers       | Jutland            | multi-type hoard | LN II   | yes                               | MA-170391        |
| B3888d        | Nationalmuseet København      | flanged axe | Galleмосe           | Randers       | Jutland            | multi-type hoard | LN II   | yes                               | MA-170392        |
| B3888e        | Nationalmuseet København      | flanged axe | Galleмосe           | Randers       | Jutland            | multi-type hoard | LN II   | yes                               | MA-170393        |
| B3888f        | Nationalmuseet København      | flanged axe | Galleмосe           | Randers       | Jutland            | multi-type hoard | LN II   | yes                               | MA-170394        |
| B3888g        | Nationalmuseet København      | flanged axe | Galleмосe           | Randers       | Jutland            | multi-type hoard | LN II   | yes                               | MA-170395        |
| B3889         | Nationalmuseet København      | ring        | Galleмосe           | Randers       | Jutland            | multi-type hoard | LN II   | yes                               | MA-170396        |
| B3891a        | Nationalmuseet København      | open ring   | Galleмосe           | Randers       | Jutland            | multi-type hoard | LN II   | yes                               | MA-170397        |
| B3891b        | Nationalmuseet København      | open ring   | Galleмосe           | Randers       | Jutland            | multi-type hoard | LN II   | yes                               | MA-170398        |
| B3891c        | Nationalmuseet København      | open ring   | Galleмосe           | Randers       | Jutland            | multi-type hoard | LN II   | yes/no                            | MA-170399        |
| B3891d        | Nationalmuseet København      | open ring   | Galleмосe           | Randers       | Jutland            | multi-type hoard | LN II   | yes                               | MA-170400        |
| B3891e        | Nationalmuseet København      | open ring   | Galleмосe           | Randers       | Jutland            | multi-type hoard | LN II   | yes                               | MA-170401        |
| B3891f        | Nationalmuseet København      | open ring   | Galleмосe           | Randers       | Jutland            | multi-type hoard | LN II   | yes                               | MA-170402        |
| B3891g        | Nationalmuseet København      | open ring   | Galleмосe           | Randers       | Jutland            | multi-type hoard | LN II   | yes/no                            | MA-170403        |
| B3885a        | Nationalmuseet København      | hook        | Galleмосe           | Randers       | Jutland            | multi-type hoard | LN II   | yes/no                            | MA-170404        |
| B3885b        | Nationalmuseet København      | hook        | Galleмосe           | Randers       | Jutland            | multi-type hoard | LN II   | yes/no                            | MA-170405        |
| B3886         | Nationalmuseet København      | hook        | Galleмосe           | Randers       | Jutland            | multi-type hoard | LN II   | yes/no                            | MA-170406        |
| FSM 2649      | Odense Bys Museer             | flanged axe | Glavendrup          | Odense        | Fyn                | single find      | LN II   | yes                               | MA-171104        |
| FSM 2650      | Odense Bys Museer             | flanged axe | Glavendrup Mark     | Odense        | Fyn                | single find      | LN II   | yes                               | MA-171099        |
| B1043         | Nationalmuseet København      | flanged axe | Grinsted            | Aalborg       | Jutland            | single find      | LN II   | yes                               | MA-170375        |
| VHM 22391     | Vedsyssel Historiske Museum   | flanged axe | Guldagergaard       | Hjoerring     | Jutland            | single find      | LN I-II | yes                               | MA-171123        |
| VHM 3208      | Vedsyssel Historiske Museum   | flanged axe | Gylling             | Aarhus        | Jutland            | single find      | LN II   | yes                               | MA-171120        |
| Thisted 1204  | Museum Thy                    | flanged axe | Handrup Odde        | Thisted       | Jutland            | single find      | NBA IA  | yes                               | MA-170438        |
| B11333        | Nationalmuseet København      | flanged axe | Havdrup             | Copenhagen    | Zealand            | single find      | LN II   | yes                               | MA-170383        |
| NM 11011      | Nationalmuseet København      | flanged axe | Herslev             | Holbaek       | Zealand            | single find      | LN II   | yes                               | MA-171078        |
| NM 10183      | Nationalmuseet København      | flanged axe | Hjadstrup           | Odense        | Fyn                | one-type hoard   | NBA IA  | yes                               | MA-166634        |
| VHM 1945/78   | Vedsyssel Historiske Museum   | flanged axe | Hjoerring           | Hjoerring     | Jutland            | single find      | LN II   | yes                               | MA-171121        |
| FSM 8882      | Odense Bys Museer             | flanged axe | Holmdrup            | Svendborg     | Fyn                | single find      | LN II   | yes                               | MA-171101        |
| NM B300       | Nationalmuseet København      | flanged axe | Horbelev            | Maribo        | Lolland            | single find      | LN II   | yes                               | MA-166627        |
| ÅHM 3210b     | Forhistorisk Museum Moesgaard | flanged axe | Hornumbro Moelle    | Aalborg       | Jutland            | single find      | LN II   | yes                               | MA-171126        |

|             |                                |             |                  |               |          |                |        |        |           |
|-------------|--------------------------------|-------------|------------------|---------------|----------|----------------|--------|--------|-----------|
| NM 10724    | Nationalmuseet København       | flanged axe | Hudevad          | Odense        | Fyn      | single find    | NBA IA | yes    | MA-170416 |
| Rud. B87    | Langelands Museum, Rudkøbing   | flanged axe | Humble           | Svendborg     | Fyn      | single find    | LN II  | yes    | MA-171095 |
| B6469       | Nationalmuseet København       | halberd     | Hvornum          | Randers       | Jutland  | single find    | LN II  | yes    | MA-171065 |
| Maribo 770  | Museum Lolland Falster         | flanged axe | Idestrup         | Maribo        | Lolland  | single find    | LN II  | yes    | MA-171094 |
| NM B8869    | Nationalmuseet København       | flanged axe | Jelling          | Vejle         | Jutland  | single find    | NBA IA | yes    | MA-166649 |
| Z99         | Nationalmuseet København       | flanged axe | Jerslev          | Holbaek       | Zealand  | single find    | LN II  | yes    | MA-170376 |
| NM B5106    | Nationalmuseet København       | flanged axe | Jordloese        | Holbaek       | Zealand  | one-type hoard | LN II  | yes    | MA-166629 |
| NM B5106    | Nationalmuseet København       | flanged axe | Jordloese        | Holbaek       | Zealand  | one-type hoard | LN II  | yes    | MA-166630 |
| B13576      | Nationalmuseet København       | flanged axe | Jordloese        | Holbaek       | Zealand  | single find    | LN II  | yes    | MA-171085 |
| Hol 16823   | Museum Vestsjælland            | flanged axe | Kalundborg       | Holbaek       | Zealand  | single find    | LN II  | yes    | MA-171087 |
| AA896       | Museum Sønderjylland Åbenrå    | flanged axe | Kalvoe           | Haderslev     | Jutland  | single find    | LN II  | yes    | MA-171118 |
| NM B9028    | Nationalmuseet København       | flanged axe | Katrinebjerg     | Copenhagen    | Zealand  | single find    | NBA IA | yes    | MA-166645 |
| B10900      | Nationalmuseet København       | flanged axe | Kildemosen       | Frederiksborg | Zealand  | single find    | NBA IA | yes    | MA-170441 |
| FSM 496     | Odense Bys Museer              | flanged axe | Knorborg         | Haderslev     | Jutland  | single find    | LN II  | yes    | MA-171109 |
| NM 7328     | Nationalmuseet København       | flanged axe | Korselitse       | Maribo        | Lolland  | hoard?         | LN II  | yes    | MA-170364 |
| NM 21075    | Nationalmuseet København       | flanged axe | Kragebaek        | Holbaek       | Zealand  | single find    | NBA IA | yes/no | MA-166647 |
| B10736      | Nationalmuseet København       | flanged axe | Kvaerkeby        | Soroe         | Zealand  | single find    | NBA IA | yes    | MA-170417 |
| FSM 4751    | Odense Bys Museer              | flanged axe | Kvaerndrupvaenge | Svendborg     | Fyn      | single find    | LN II  | yes    | MA-171105 |
| NM 1669     | Nationalmuseet København       | flanged axe | Langebjerg Mose  | Odense        | Fyn      | single find    | NBA IA | yes    | MA-170430 |
| B11203      | Nationalmuseet København       | halberd     | Lejregaard       | Copenhagen    | Zealand  | single find    | LN II  | yes/no | MA-171070 |
| B1014       | Nationalmuseet København       | flanged axe | Lillerup         | Skanderborg   | Jutland  | single find    | LN II  | yes    | MA-170357 |
| VSM 6121    | Viborg Stiftsmuseum            | flanged axe | Loevelbro Mark   | Viborg        | Jutland  | single find    | LN II  | yes    | MA-171128 |
| NM 2730     | Nationalmuseet København       | flanged axe | Lumby Torp       | Odense        | Fyn      | one-type hoard | LN II  | yes    | MA-170411 |
| NM 2731     | Nationalmuseet København       | flanged axe | Lumby Torp       | Odense        | Fyn      | one-type hoard | LN II  | yes    | MA-170412 |
| NM 2732     | Nationalmuseet København       | flat axe    | Lumby Torp       | Odense        | Fyn      | one-type hoard | LN II  | yes    | MA-170413 |
| ML11056     | Museum Lund                    | flanged axe | Löddeköpinge     | Schonen       | Sweden   | single find    | LN II  | yes    | MA-181037 |
| NM B9393    | Nationalmuseet København       | flanged axe | Magleby          | Soroe         | Zealand  | single find    | NBA IA | yes    | MA-166646 |
| NM 16201    | Nationalmuseet København       | flanged axe | Magleholm        | Maribo        | Lolland  | single find    | LN II  | yes    | MA-171073 |
| SØM 4218    | Odense Bys Museer              | flanged axe | Mjang            | Soenderborg   | Jutland  | single find    | LN II  | yes    | MA-171113 |
| NM B4077    | Nationalmuseet København       | flanged axe | Moskjaer         | Randers       | Jutland  | single find    | NBA IA | yes    | MA-166656 |
| NM B6655    | Nationalmuseet København       | flanged axe | Nakkehoved       | Frederiksborg | Zealand  | single find    | LN II  | yes    | MA-166621 |
| B9092       | Nationalmuseet København       | flanged axe | near Bogense     | Odense        | Fyn      | single find    | LN II  | yes    | MA-170372 |
| B6678       | Nationalmuseet København       | flanged axe | near Davrup      | Holbaek       | Zealand  | single find    | LN II  | yes    | MA-170361 |
| Maribo H25a | Museum Lolland Falster         | flanged axe | near Maribo      | Maribo        | Lolland  | single find    | LN II  | yes    | MA-171092 |
| Maribo H25b | Museum Lolland Falster         | flanged axe | near Maribo      | Maribo        | Lolland  | single find    | LN II  | yes    | MA-171093 |
| NM 2870     | Nationalmuseet København       | flanged axe | near Praesto     | Praestoe      | Zealand  | single find    | LN II  | yes    | MA-170384 |
| NM 26073    | Nationalmuseet København       | flanged axe | near Silkeborg   | Skanderborg   | Jutland  | single find    | NBA IA | yes    | MA-170418 |
| NM B9390    | Nationalmuseet København       | flanged axe | near Skaelskoer  | Soroe         | Zealand  | single find    | NBA IA | yes    | MA-166644 |
| NM 26067    | Nationalmuseet København       | flanged axe | near Aalborg     | Aalborg       | Jutland  | single find    | LN II  | yes    | MA-171077 |
| CM71        | Odense Bys Museer              | flanged axe | North Fyn        | Odense        | Fyn      | single find    | NBA IA | yes    | MA-170428 |
| HAD 795     | Museum Sønderjylland Haderslev | flanged axe | Nustrup Parish   | Haderslev     | Jutland  | single find    | LN II  | yes    | MA-171112 |
| NM B2162    | Nationalmuseet København       | flanged axe | Nysted           | Maribo        | Lolland  | single find    | NBA IA | yes    | MA-166654 |
| Horsens A4  | Horsens Museum                 | flanged axe | Odder            | Horsens       | Jutland  | single find    | LN II  | yes    | MA-171119 |
| B10790      | Nationalmuseet København       | flanged axe | Odsherred        | Holbaek       | Zealand  | one-type hoard | LN II  | yes    | MA-170350 |
| B10791      | Nationalmuseet København       | flanged axe | Odsherred        | Holbaek       | Zealand  | one-type hoard | LN II  | yes    | MA-170381 |
| B10789      | Nationalmuseet København       | flanged axe | Odsherred        | Holbaek       | Zealand  | one-type hoard | LN II  | yes    | MA-170385 |
| NM 20623    | Nationalmuseet København       | flanged axe | Pebertved        | Svendborg     | Fyn      | single find    | NBA IA | yes    | MA-166643 |
| B11127      | Nationalmuseet København       | flanged axe | Pederstrup       | Maribo        | Lolland  | single find    | LN II  | yes    | MA-170356 |
| B1094       | Nationalmuseet København       | flanged axe | Pederstrup       | Copenhagen    | Zealand  | single find    | LN II  | yes    | MA-170377 |
| B5118       | Nationalmuseet København       | halberd     | Pederstrup       | Copenhagen    | Zealand  | one-type hoard | LN II  | yes    | MA-171068 |
| B5118       | Nationalmuseet København       | halberd     | Pederstrup       | Copenhagen    | Zealand  | one-type hoard | LN II  | yes    | MA-171069 |
| NM 6838     | Nationalmuseet København       | flanged axe | Ramsogaard       | Copenhagen    | Zealand  | single find    | LN II  | yes    | MA-170386 |
| FSM B581    | Odense Bys Museer              | flanged axe | Refs-Vindinge    | Svendborg     | Fyn      | single find    | LN II  | yes    | MA-171098 |
| NM B9819    | Nationalmuseet København       | flanged axe | Rye              | Copenhagen    | Zealand  | single find    | LN II  | yes    | MA-166625 |
| NM B10993   | Nationalmuseet København       | flanged axe | Raabjerg         | Hjoerring     | Jutland  | single find    | NBA IA | yes    | MA-166642 |
| NM B3143    | Nationalmuseet København       | flanged axe | Saerslev         | Holbaek       | Zealand  | single find    | LN II  | yes    | MA-166632 |
| NM 356      | Nationalmuseet København       | flanged axe | Saksgaard        | Soenderborg   | Jutland  | single find    | NBA IA | yes    | MA-170432 |
| B6676       | Nationalmuseet København       | halberd     | Sandager         | Svendborg     | Fyn      | single find    | LN II  | yes    | MA-171066 |
| FHM 2728    | Forhistorisk Museum Moesgaard  | flanged axe | Sejet            | Skanderborg   | Jutland  | burial         | LN II  | yes    | MA-171131 |
| NM 4558     | Nationalmuseet København       | flanged axe | Selchausdal      | Holbaek       | Zealand  | single find?   | LN II  | yes    | MA-170353 |
| B5310       | Nationalmuseet København       | flanged axe | Selchausdal      | Holbaek       | Zealand  | single find?   | LN II  | yes    | MA-170388 |
| B1947       | Nationalmuseet København       | flanged axe | Sevel            | Ringkoebing   | Jutland  | single find    | NBA IA | yes    | MA-181025 |
| B98         | Nationalmuseet København       | flanged axe | Simmerboelle     | Svendborg     | Fyn      | burial         | NBA IA | yes    | MA-170426 |
| CM107       | Odense Bys Museer              | flanged axe | Skaerbaek Moelle | Haderslev     | Jutland  | single find    | NBA IA | yes    | MA-170429 |
| B8687       | Nationalmuseet København       | flanged axe | Skannerup        | Skanderborg   | Jutland  | single find    | NBA IA | yes    | MA-170422 |
| NM 20948    | Nationalmuseet København       | flanged axe | Skenkelsoe       | Frederiksborg | Zealand  | single find    | NBA IA | yes    | MA-170421 |
| FSM CM142   | Odense Bys Museer              | flanged axe | Skibby           | Frederiksborg | Zealand  | single find    | LN II  | yes    | MA-171107 |
| SØM 3198    | Odense Bys Museer              | flanged axe | Skodsboel        | Soenderborg   | Jutland  | one-type hoard | LN II  | yes    | MA-171114 |
| SØM 3197    | Odense Bys Museer              | flanged axe | Skodsboel        | Soenderborg   | Jutland  | one-type hoard | LN II  | yes    | MA-171115 |
| NM 11820    | Nationalmuseet København       | flanged axe | Skoerping        | Aalborg       | Jutland  | single find    | NBA IA | yes/no | MA-166653 |
| B3240       | Nationalmuseet København       | flanged axe | Skovballe        | Svendborg     | Fyn      | single find    | LN II  | yes    | MA-170373 |
| NM 9708     | Nationalmuseet København       | flanged axe | Skovsbogaard     | Odense        | Fyn      | single find    | NBA IA | yes    | MA-170427 |
| FHM 6299    | Forhistorisk Museum Moesgaard  | flanged axe | Sniderup         | Viborg        | Jutland  | single find    | LN II  | yes    | MA-171132 |
| FHM 2994    | Forhistorisk Museum Moesgaard  | flat axe    | Soerup Mark      | Svendborg     | Fyn      | single find    | NBA IA | yes    | MA-171058 |
| NM B9391    | Nationalmuseet København       | flanged axe | south Fyn        | Svendborg     | Fyn      | single find    | NBA IA | yes    | MA-166636 |
| Hol 9655    | Museum Vestsjælland            | flanged axe | Spaanbaekgaard   | Holbaek       | Zealand  | single find    | LN II  | yes    | MA-171090 |
| B704        | Nationalmuseet København       | flanged axe | St. Duegaard     | Bornholm      | Bornholm | single find    | LN II  | yes    | MA-170354 |
| NM 16783    | Nationalmuseet København       | flanged axe | Stensby          | Odense        | Fyn      | single find    | NBA IA | yes    | MA-166637 |

|              |                               |             |                 |               |          |                  |        |        |           |
|--------------|-------------------------------|-------------|-----------------|---------------|----------|------------------|--------|--------|-----------|
| FHM 6264     | Forhistorisk Museum Moesgaard | flanged axe | Stiling         | Skanderborg   | Jutland  | single find      | LN II  | yes    | MA-166619 |
| NM B1517     | Nationalmuseet København      | flanged axe | Store Almegaard | Bornholm      | Bornholm | burial           | NBA IA | yes    | MA-166652 |
| NM MLXIX     | Nationalmuseet København      | flanged axe | Store-Heddinge  | Praestoe      | Zealand  | one-type hoard   | LN II  | yes/no | MA-170407 |
| NM MLXXa     | Nationalmuseet København      | flanged axe | Store-Heddinge  | Praestoe      | Zealand  | one-type hoard   | LN II  | yes/no | MA-170408 |
| NM MLXXc     | Nationalmuseet København      | flanged axe | Store-Heddinge  | Praestoe      | Zealand  | one-type hoard   | LN II  | yes/no | MA-170410 |
| B1182        | Nationalmuseet København      | flanged axe | Store-Toroeje   | Praestoe      | Zealand  | one-type hoard   | LN II  | yes    | MA-170365 |
| NM B7534     | Nationalmuseet København      | flanged axe | Svendsmark      | Praestoe      | Zealand  | single find      | LN II  | yes/no | MA-166622 |
| B13980       | Nationalmuseet København      | flanged axe | Svinninge       | Holbaek       | Zealand  | single find      | LN II  | yes    | MA-170363 |
| B6737        | Nationalmuseet København      | flanged axe | Svinsbjerg      | Maribo        | Lolland  | single find      | LN II  | yes    | MA-170355 |
| NM B9392     | Nationalmuseet København      | flanged axe | Thise Hede      | Viborg        | Jutland  | single find      | NBA IA | yes    | MA-166650 |
| 141/53       | Roskilde Museum/ ROMU         | flanged axe | Tjaereby        | Copenhagen    | Zealand  | single find      | NBA IA | yes    | MA-170425 |
| NM 3887      | Nationalmuseet København      | flanged axe | Tolne Parish    | Hjoerring     | Jutland  | burial           | LN II  | yes    | MA-170358 |
| VHM 5384     | Vedssysel Historiske Museum   | flanged axe | Tolne Parish    | Hjoerring     | Jutland  | single find      | LN II  | yes    | MA-171122 |
| B10821       | Nationalmuseet København      | flanged axe | Tranderupgaard  | Soroe         | Zealand  | single find      | LN II  | yes    | MA-170382 |
| NM B11334    | Nationalmuseet København      | flanged axe | Trustrup        | Randers       | Jutland  | single find      | LN II  | yes    | MA-166626 |
| Horsens A2   | Horsens Museum                | flanged axe | Tvingstrup      | Skanderborg   | Jutland  | single find      | NBA IA | yes    | MA-170436 |
| B12993       | Nationalmuseet København      | flanged axe | Taarup          | Maribo        | Lolland  | single find      | LN II  | yes    | MA-170366 |
| B6816        | Nationalmuseet København      | flanged axe | Ubberup         | Holbaek       | Zealand  | single find      | LN II  | yes    | MA-170380 |
| FHM 140A     | Forhistorisk Museum Moesgaard | flanged axe | Ulstrup         | Viborg        | Jutland  | one-type hoard   | LN II  | yes    | MA-166610 |
| B3647        | Nationalmuseet København      | flanged axe | Vaerslev        | Holbaek       | Zealand  | one-type hoard   | LN II  | yes    | MA-171080 |
| B3688        | Nationalmuseet København      | flanged axe | Vaerslev        | Holbaek       | Zealand  | one-type hoard   | LN II  | yes    | MA-171081 |
| B3855        | Nationalmuseet København      | halberd     | Veksoe          | Frederiksborg | Zealand  | single find      | LN II  | yes/no | MA-171071 |
| S11243       | Svendborg Museum              | flanged axe | Vendsted Mose   | Svendborg     | Fyn      | single find      | LN II  | yes    | MA-171096 |
| NM B5557     | Nationalmuseet København      | flanged axe | Vindebaekkobbøl | Maribo        | Lolland  | single find      | NBA IA | yes    | MA-166648 |
| NM 19198     | Nationalmuseet København      | flanged axe | Vindebæk        | Praestoe      | Zealand  | single find      | LN II  | yes    | MA-170362 |
| B3962        | Nationalmuseet København      | flanged axe | Virring         | Randers       | Jutland  | multi-type hoard | NBA IA | yes    | MA-170423 |
| B3963        | Nationalmuseet København      | flanged axe | Virring         | Randers       | Jutland  | multi-type hoard | NBA IA | yes    | MA-170424 |
| B3958        | Nationalmuseet København      | spearhead   | Virring         | Randers       | Jutland  | multi-type hoard | NBA IA | yes    | MA-180958 |
| B3959        | Nationalmuseet København      | spearhead   | Virring         | Randers       | Jutland  | multi-type hoard | NBA IA | yes    | MA-180959 |
| B3960        | Nationalmuseet København      | spearhead   | Virring         | Randers       | Jutland  | multi-type hoard | NBA IA | yes    | MA-180960 |
| B3961        | Nationalmuseet København      | spearhead   | Virring         | Randers       | Jutland  | multi-type hoard | NBA IA | yes    | MA-180961 |
| NM B6644     | Nationalmuseet København      | flanged axe | Vorbasse        | Ribe          | Jutland  | single find      | NBA IA | yes    | MA-166638 |
| B10464       | Nationalmuseet København      | flanged axe | Vrold           | Skanderborg   | Jutland  | burial           | LN II  | yes    | MA-170367 |
| Hobro 1001A  | Naturhistorisk Museum Aalborg | flanged axe | West Himmerland | Aalborg       | Jutland  | single find      | NBA IA | yes    | MA-170440 |
| B11683       | Nationalmuseet København      | flanged axe | West Lolland    | Maribo        | Lolland  | single find      | LN II  | yes    | MA-170371 |
| NM 26062     | Nationalmuseet København      | flanged axe | Ørnboelle Hede  | Hjoerring     | Jutland  | burial           | LN II  | yes    | MA-170374 |
| B7857        | Nationalmuseet København      | flanged axe | Ørum            | Randers       | Jutland  | single find      | LN II  | yes    | MA-170368 |
| FSM CM104    | Odense Bys Museer             | flanged axe | Øster-Lunde     | Odense        | Fyn      | single find      | LN II  | yes    | MA-171103 |
| B3494        | Nationalmuseet København      | flanged axe | Øster-Møllerup  | Hjoerring     | Jutland  | single find      | NBA IA | yes    | MA-170415 |
| AA901        | Museum Sønderjylland Åbenrå   | flanged axe | Aabenraa County | Aabenraa      | Jutland  | single find      | LN II  | yes    | MA-171116 |
| Ringk. 1710A | Ringkøbing-Skjern Museum      | flanged axe | Aabjerg         | Ringkøbing    | Jutland  | multi-type hoard | NBA IA | yes    | MA-170437 |
| NM B6821     | Nationalmuseet København      | flanged axe |                 | Jutland       | Jutland  | single find      | NBA IA | yes    | MA-166655 |
| B2430        | Nationalmuseet København      | flanged axe |                 | Zealand       | Zealand  | single find      | LN II  | yes    | MA-170379 |
| NM 26060     | Nationalmuseet København      | flanged axe |                 | Denmark       | Denmark  | single find      | LN II  | yes    | MA-170387 |
| NM NM        | Nationalmuseet København      | flanged axe |                 | Denmark       | Denmark  | single find      | LN II  | yes    | MA-170414 |
| NM B4489     | Nationalmuseet København      | flanged axe |                 | Denmark       | Denmark  | single find      | NBA IA | yes/no | MA-170419 |
| NM B13535    | Nationalmuseet København      | flanged axe |                 | Denmark       | Denmark  | single find      | NBA IA | yes/no | MA-170420 |
| CM146        | Odense Bys Museer             | flanged axe |                 | Zealand       | Zealand  | single find      | NBA IA | yes    | MA-170431 |
| NM 2540      | Nationalmuseet København      | flanged axe |                 | Denmark       | Denmark  | single find      | NBA IA | yes    | MA-170434 |
| VHM 13835    | Vedssysel Historiske Museum   | flanged axe |                 | Denmark       | Denmark  | single find      | NBA IA | yes    | MA-170439 |
| B4487        | Nationalmuseet København      | flanged axe |                 | Denmark       | Denmark  | single find      | LN II  | yes    | MA-171075 |
| NM           | Nationalmuseet København      | flanged axe |                 | Denmark       | Denmark  | single find      | LN II  | yes    | MA-171076 |
| DXCIX        | Nationalmuseet København      | flanged axe |                 | Denmark       | Denmark  | single find      | LN II  | yes    | MA-171082 |
| B13536       | Nationalmuseet København      | flanged axe |                 | Denmark       | Denmark  | single find      | LN II  | yes    | MA-171083 |
| B4486        | Nationalmuseet København      | flanged axe |                 | Denmark       | Denmark  | single find      | LN II  | yes    | MA-171086 |
| Nt 1015/265  | Næstved Museum                | flanged axe |                 | Denmark       | Denmark  | single find      | LN II  | yes    | MA-171091 |
| FSM CM99     | Odense Bys Museer             | flanged axe |                 | Zealand       | Zealand  | single find      | LN II  | yes    | MA-171108 |
| FSM 4061     | Odense Bys Museer             | flanged axe |                 | Denmark       | Denmark  | single find      | LN II  | yes    | MA-171111 |
| ÅHM 1578     | Forhistorisk Museum Moesgaard | flanged axe |                 | Denmark       | Denmark  | single find      | LN II  | yes    | MA-171124 |
| ÅHM 3384     | Forhistorisk Museum Moesgaard | flanged axe |                 | Denmark       | Denmark  | single find      | LN II  | yes    | MA-171125 |
| NM 1495      | Nationalmuseet København      | flanged axe |                 | Denmark       | Denmark  | single find      | LN II  | yes    | MA-171129 |
